# Supplementary material
Source: PubMed Central journal article supplement (PMC6519661)
Supplement: awy320_supplementary_material.pdf [file awy320_supplementary_material.pdf]

## Supplementary material

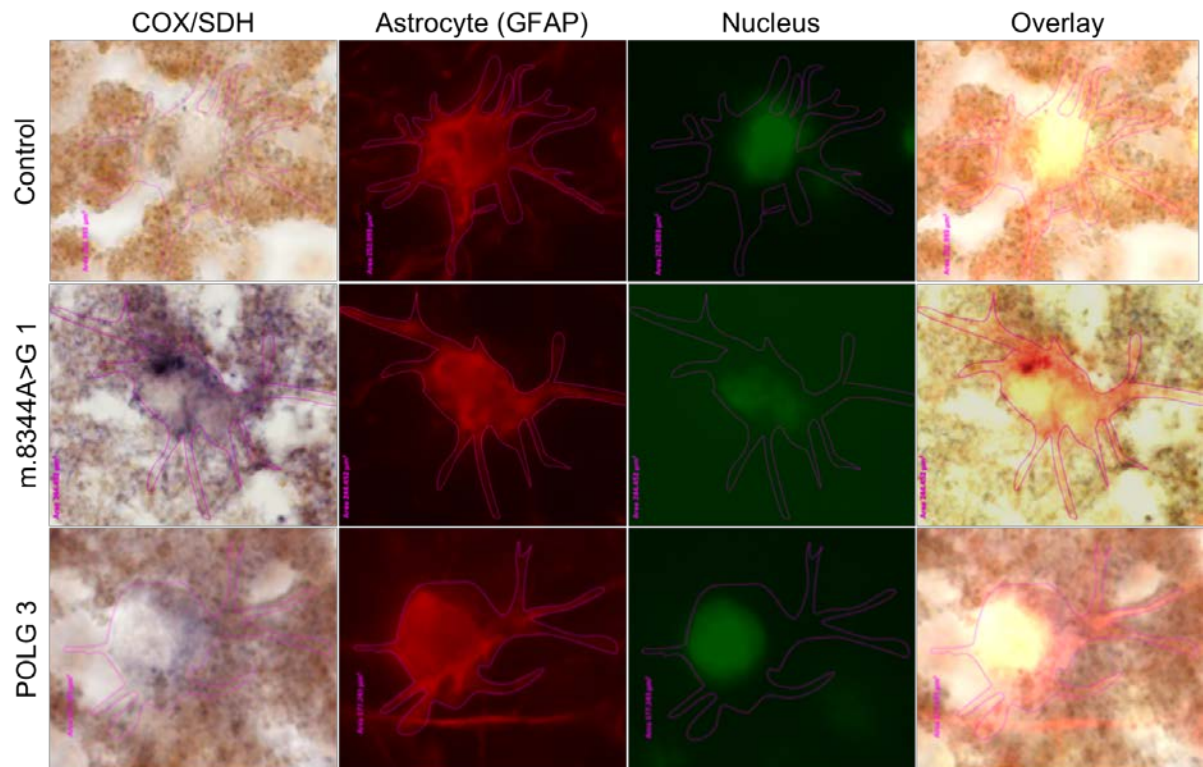

**Supplementary Figure 1: Identification of cytochrome c oxidase (COX)-deficient and succinate dehydrogenase (SDH)-positive GFAP-immunoreactive astrocytes in patient tissues indicate the presence of respiratory chain deficiency affecting astrocytes.**

COX-SDH histochemistry followed by sequential immunofluorescent labelling of astrocytes (GFAP; red) reveals COX-positive (brown staining) astrocytes in control tissues while patients show COX-deficiency (blue staining) affecting astrocytes, indicating mitochondrial respiratory chain deficiency.

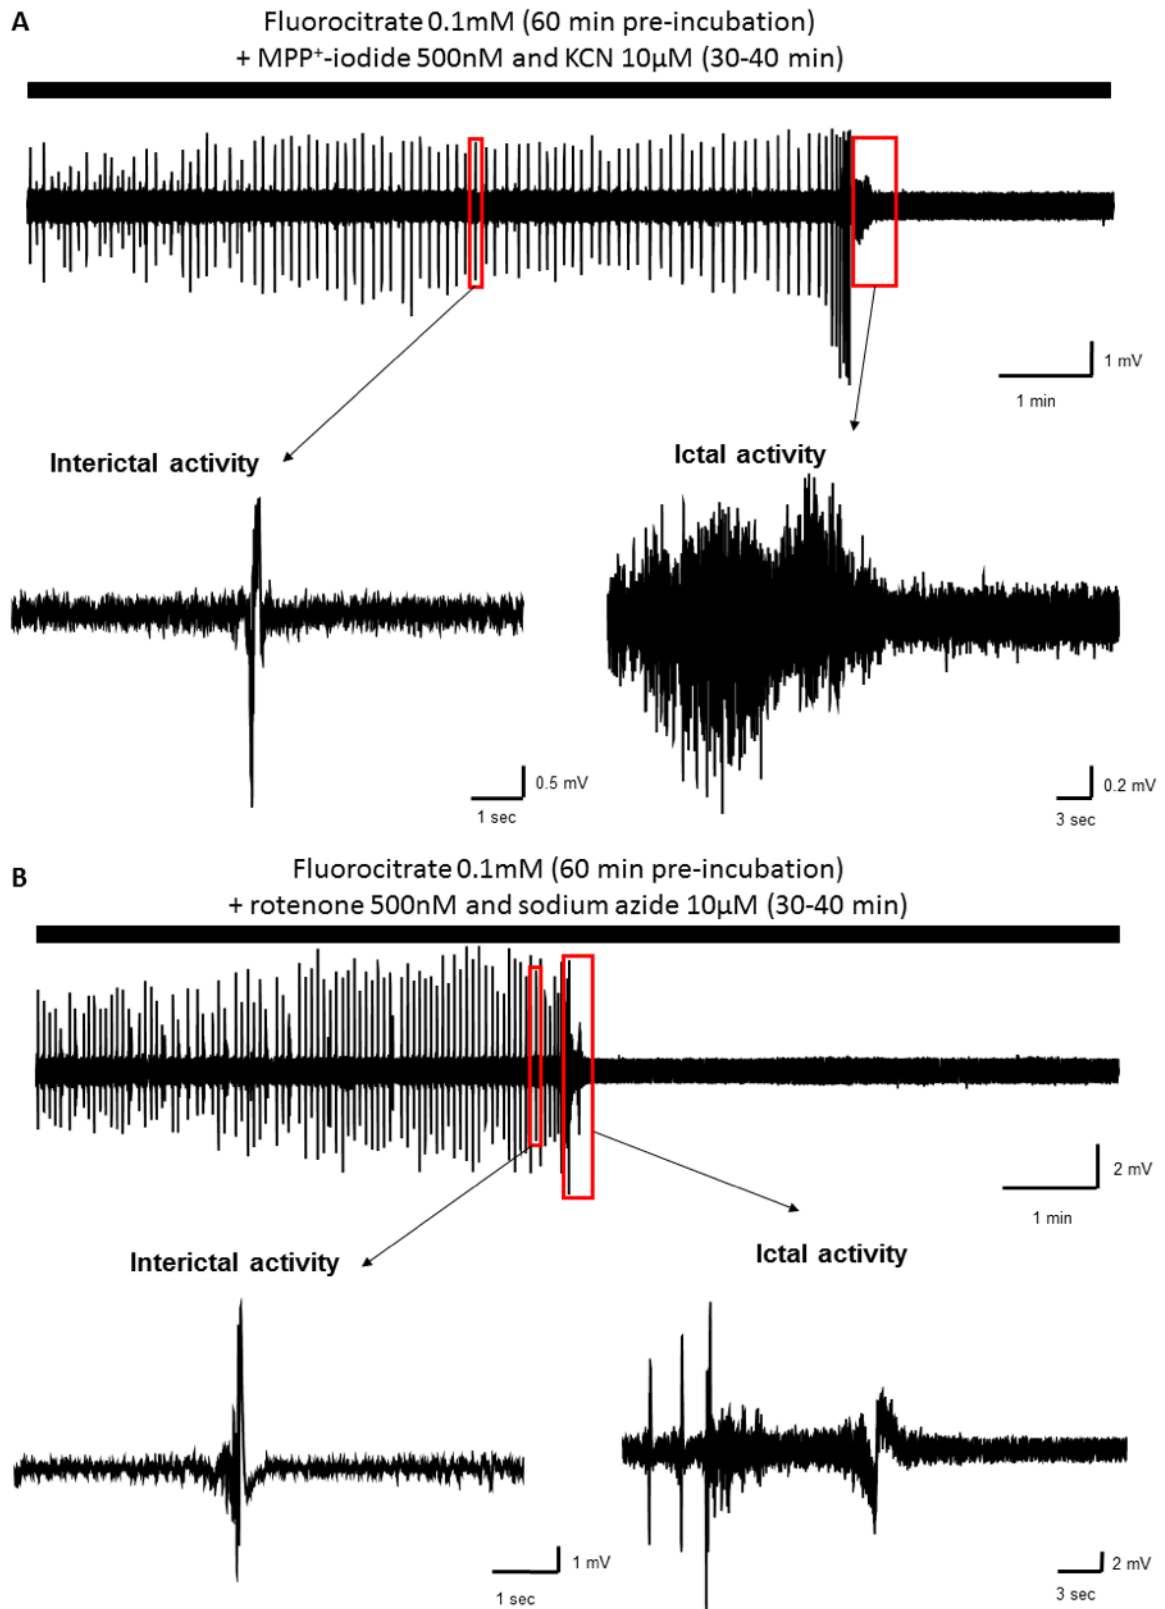

**Supplementary Figure 2: Mitochondrial epileptic activity induction is not dependent on the specific use of rotenone or potassium cyanide.**

Rather, it appears that mitochondrial epileptic activity induction in this model is dependent on the concomitant inhibition of mitochondrial complex I and IV. Substitution of rotenone with equimolar MPP<sup>+</sup>-iodide (A) was adequate for induction of mitochondrial epileptiform discharges in the same pattern as it would in the presence of rotenone; the interictal – ictal cycle for the first 120 minutes (n=8). Similarly, sodium azide (B) was able to substitute for potassium cyanide as a complex IV inhibitor for the induction of mitochondrial epileptiform discharges (n=6). Again, the same pattern of interictal – ictal cycle was observed in the first 120 minutes. In both cases, the activity progressed in the similar manner to the late recurrent interictal discharges.

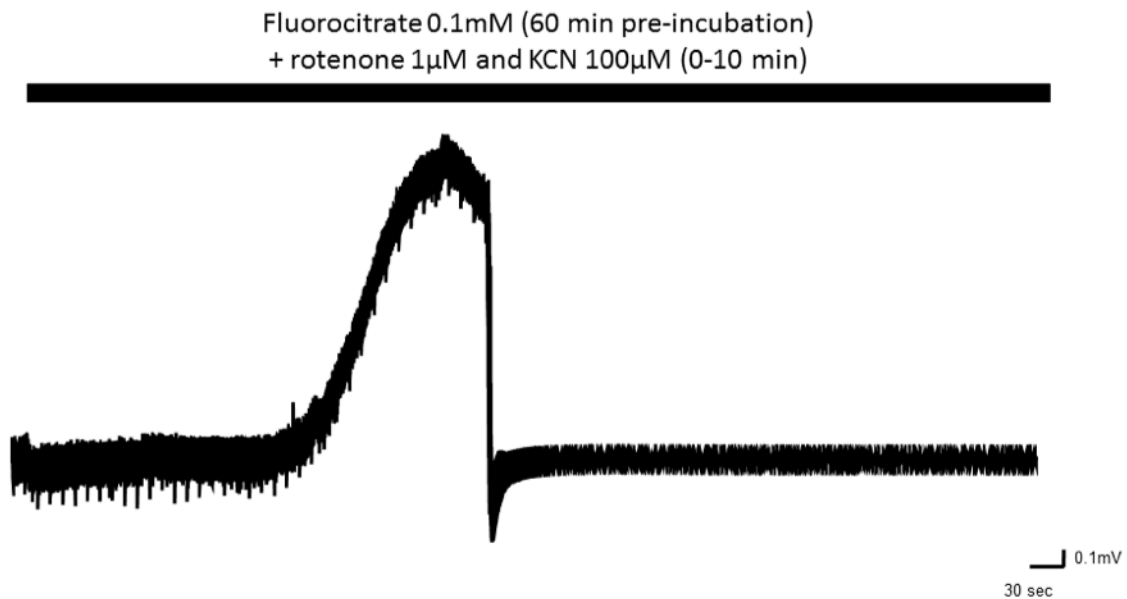

**Supplementary Figure 3: Higher concentrations of mitochondrial respiratory chain inhibitors led to the induction of spreading depression instead of epileptiform discharges.**

Washing in a higher concentration of the mitochondrial respiratory chain inhibitors; rotenone at 1 $\mu$ M and potassium cyanide at 100 $\mu$ M, induced generalized spreading depression rather than the classic cyclical interictal – ictal discharges (n=8). This generalized spreading depression is a giant wave of neuronal and glial depolarization that is followed by a long-lasting period of electrical silence in the brain slice. To us, the spreading depression represents a progression of electrophysiological manifestation of energy failure where in low to moderate energy failure, epileptiform discharges are induced and in a more severe form of energy failure, generalized spreading depression is induced instead.

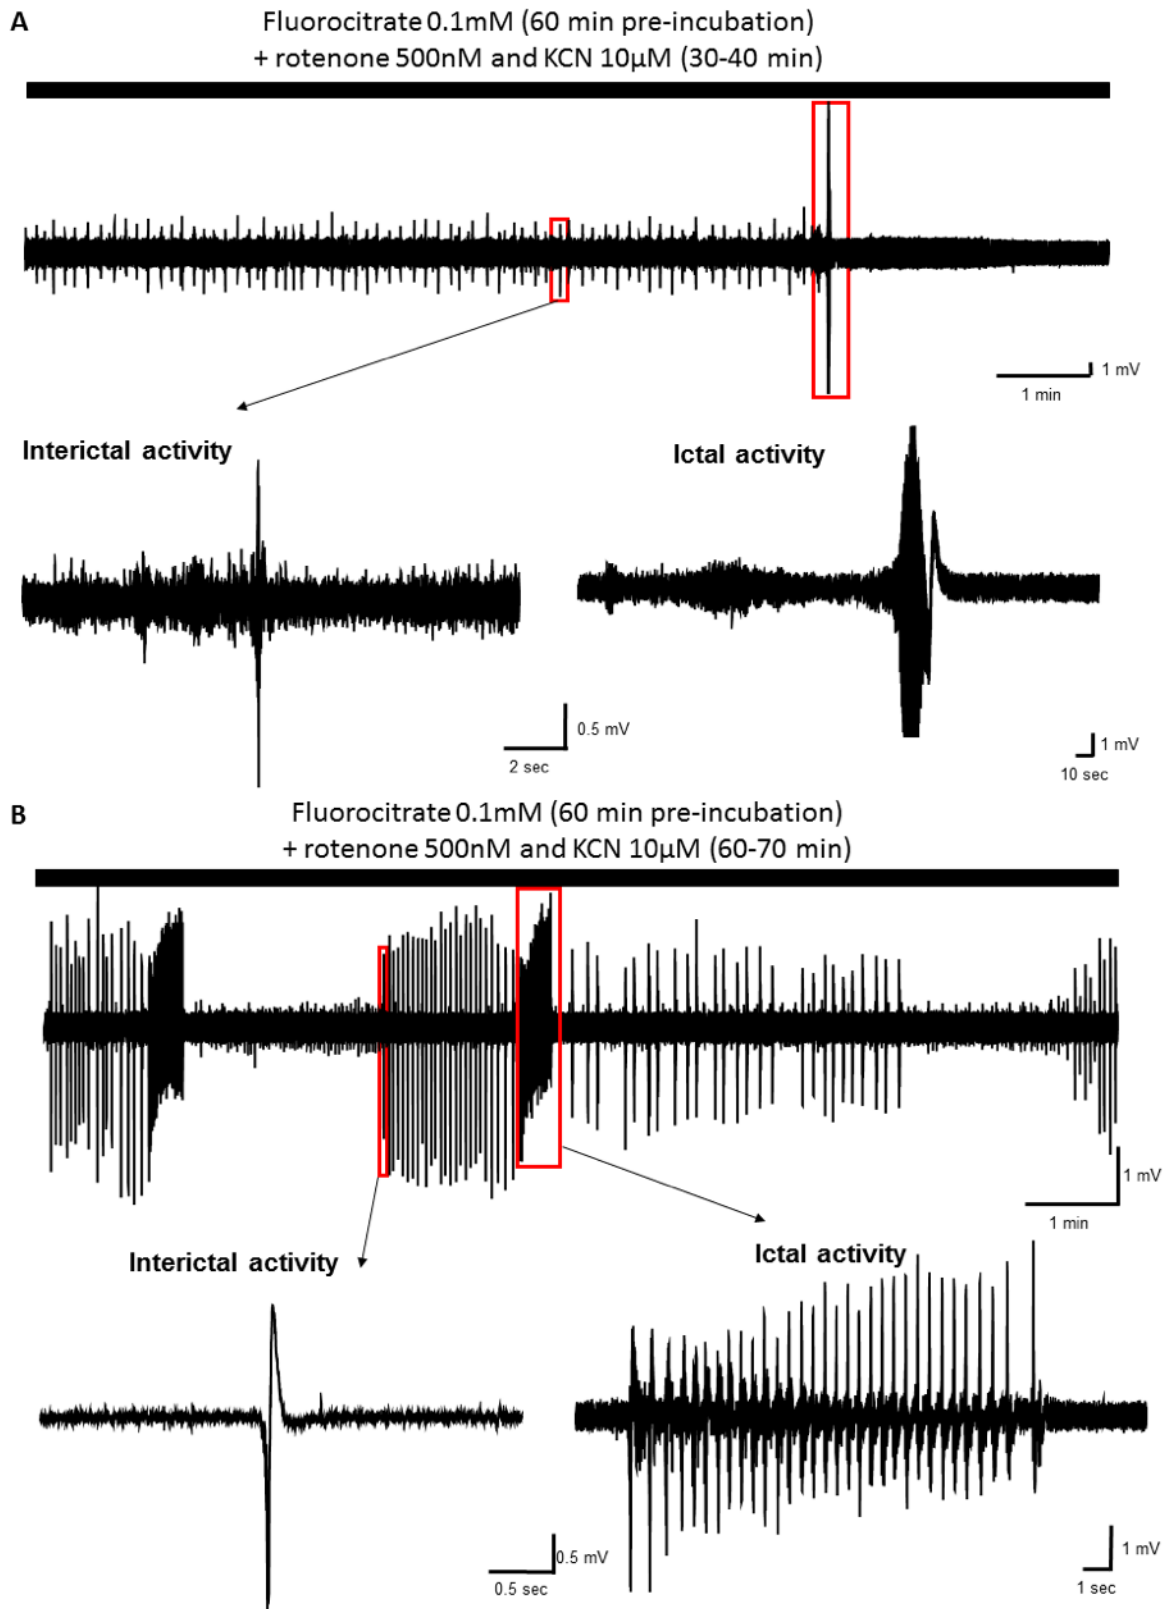

**Supplementary Figure 4: Mitochondrial epileptic activity induction is conserved across species.**

The figure demonstrates the typical interictal – ictal activity that was induced with the protocol of pre-incubation with fluorocitrate followed by concomitant application of rotenone and cyanide. These activities were recorded from acutely prepared mice brain slice (A) (n=10) and acutely resected human brain tissue (B) (n=6). In both species, the same progression to late recurrent interictal discharges was also noted.

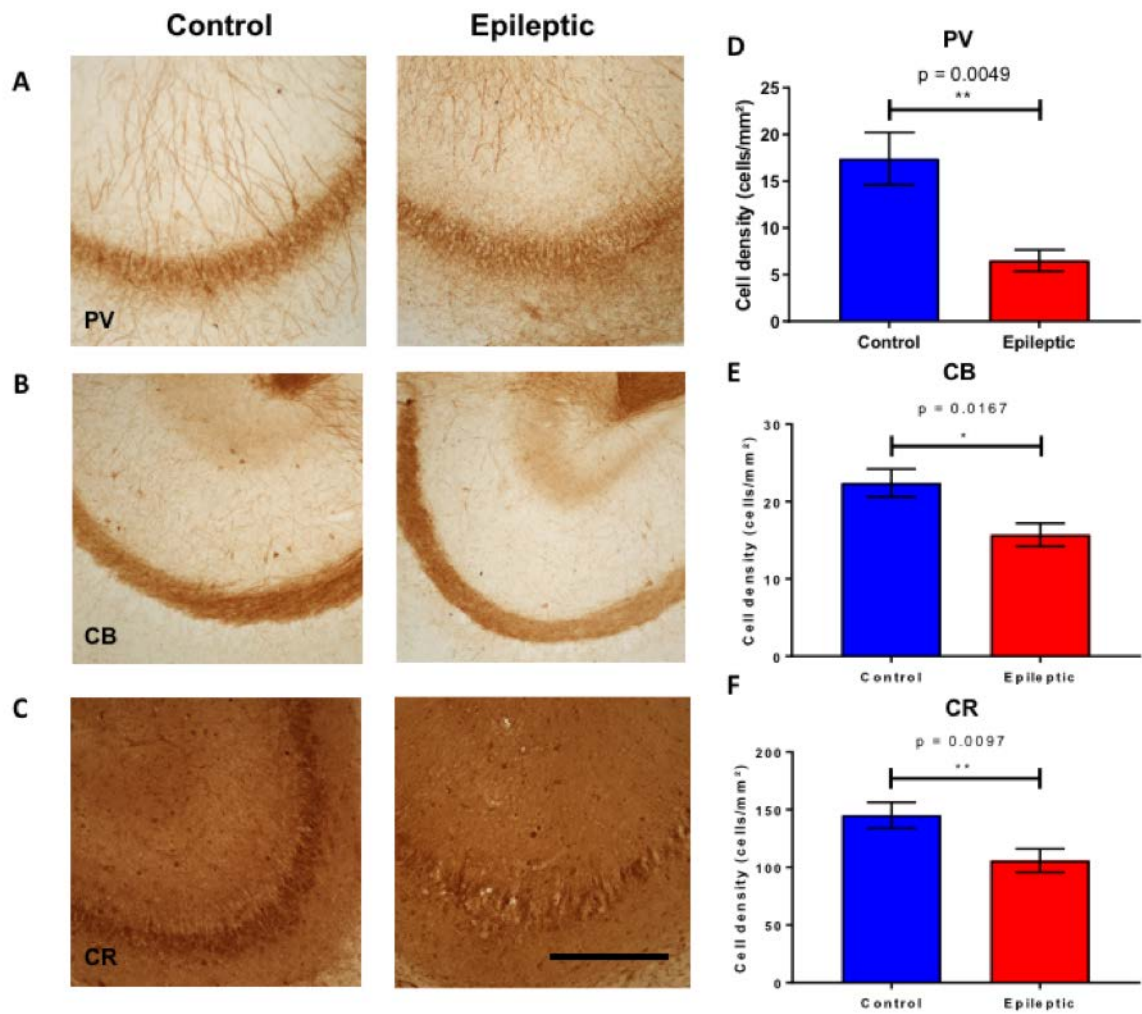

**Supplementary Figure 5: There is a generalized loss of interneuron marker expression in the epileptic brain slices.**

Following the observed loss of GABAergic cells, we examined interneuron marker expression in the epileptic brain slices. There appeared to be a significant loss of parvalbumin expression in the epileptic slices as compared against control (A) and the same was observed with calbindin (B) and calretinin (C) expression. These are quantified in the graphs (D-F) showing the cell density of the expression of parvalbumin (n=6 control, 6 epileptic), calbindin (n=5 control, 7 epileptic), and calretinin (n=9 control, 11 epileptic); all of which

showed significant reduction in epileptic slices. \*  $p \leq 0.05$  \*\*  $p \leq 0.01$ . Data are presented as mean  $\pm$  s.e.m. in (D-F).

**Supplementary Table 1**

| No | Age at surgery (years) | Gender | Seizure semiology        | Pathology                        | Type of surgery | Brain region        | Surgical outcome                    | Antiepileptic medication** |
|----|------------------------|--------|--------------------------|----------------------------------|-----------------|---------------------|-------------------------------------|----------------------------|
| 1  | 25                     | F      | Complex partial seizures | Mesial temporal sclerosis        | SAH             | Right temporal lobe | Seizure-free with post-op nystagmus | CBZ                        |
| 2  | 38                     | M      | Complex partial seizures | Hippocampal sclerosis            | SAH             | Left temporal lobe  | Seizure-free                        | VPA/ECBZ/LEV               |
| 3  | 23                     | F      | Complex partial seizures | Mesial temporal sclerosis        | SAH             | Left temporal lobe  | Seizure-free                        | LEV                        |
| 4  | 29                     | F      | Complex partial seizures | Mesial temporal sclerosis        | SAH             | Right temporal lobe | Seizure-free                        | LEV/LTG                    |
| 5  | 36                     | M      | Focal onset seizures     | Grade III anaplastic astrocytoma | AL              | Left temporal lobe  | No reduction in seizure             | CBZ                        |
| 6  | 53                     | F      | Generalised seizures     | Glioblastoma multiforme          | FC              | Left frontal lobe   | Seizure-free                        | PHT/CBZ                    |

SAH – selective amygdalohippocampectomy, AL – anterior lobectomy, FC – frontal craniotomy.

\*\* CBZ – carbamazepine, VPA – valproate, ECBZ – eslicarbazepine, LEV – levetiracetam, LTG – lamotrigine, PHT – phenytoin

**Supplementary Table 2**

| <b>Drug name</b>              | <b>Supplier</b> | <b>Product code</b> |
|-------------------------------|-----------------|---------------------|
| Fluorocitric acid barium salt | Sigma Aldrich   | F9634               |
| Rotenone                      | Sigma Aldrich   | R8875               |
| Potassium cyanide             | Sigma Aldrich   | 60178               |
| MPP <sup>+</sup> -iodide      | Sigma Aldrich   | D048                |
| Sodium azide                  | Sigma Aldrich   | 52002               |
| Carbamazepine                 | Tocris          | 4098                |
| Lamotrigine                   | Sigma Aldrich   | L3791               |
| Levetiracetam                 | Sigma Aldrich   | L8668               |
| Valproate acid                | Sigma Aldrich   | P4543               |
| Diphenylhydantoin (phenytoin) | Sigma Aldrich   | D4505               |
| Midazolam                     | Tocris          | 2832                |
| Lorazepam                     | Sigma Aldrich   | L1764               |
| Sodium pentobarbital          | Sigma Aldrich   | P3761               |
| GABA                          | Tocris          | 0344                |
| L-glutamine                   | Sigma Aldrich   | G3126               |
| L-glutamic acid               | Sigma Aldrich   | G1251               |

**Supplementary Table 3**

| <b>Target protein</b>                          | <b>Supplier</b> | <b>Product code</b> | <b>Host species</b> | <b>Dilution</b>     |
|------------------------------------------------|-----------------|---------------------|---------------------|---------------------|
| NeuN                                           | Merck Millipore | ABN90P              | Guinea pig          | 1:1000              |
| GABA                                           | Sigma Aldrich   | A0310               | Mouse               | 1:1000              |
| CaMKII                                         | Abcam           | AB52476             | Rabbit              | 1:1000              |
| GFAP                                           | Merck Millipore | AB5804              | Rabbit              | 1:1000              |
| PV                                             | Sigma Aldrich   | P3088               | Mouse               | 1:1000              |
| CB                                             | Swant           | CB38                | Rabbit              | 1:10,000            |
| CR                                             | Swant           | CG1                 | Goat                | 1:1000              |
| <b>Secondary Antibody</b>                      |                 |                     | <b>Supplier</b>     | <b>Product code</b> |
| Biotinylated goat-anti rabbit IgG antibody     |                 |                     | Vector Laboratories | BA-1000             |
| Biotinylated horse-anti mouse IgG antibody     |                 |                     | Vector Laboratories | BA-2000             |
| Biotinylated goat-anti guinea pig IgG antibody |                 |                     | Vector Laboratories | BA-4000             |
